# Supplementary material for: Benign mid-gap halide vacancy states in 2D-bismuth-based halide perovskite microcrystals for enhanced broadband photodetectors
Source: Royal Society of Chemistry journal article supplement (doi:10.1039/d4mh01532k), 2025-01-01
Supplement: d4mh01532k1.pdf [file d4mh01532k1.pdf]

## Supporting Information

### Benign Mid-Gap Halide Vacancy States in 2D-Bismuth-Based Halide Perovskite Microcrystals for Enhanced Broadband Photodetectors

Kuntal Singh<sup>a#</sup>, Mozakkar Hossain<sup>ab#</sup>, Pabitra Kumar Nayak<sup>c</sup>, Sougata Karmakar<sup>a</sup>, Akash Tripathi<sup>d</sup>, Prakash Sarkar<sup>a</sup>, Pratyasha Rudra<sup>e</sup>, A. V. Muhammed Ali<sup>a</sup>, G. Krishnamurthy Grandhi<sup>f</sup>, Paola Vivo<sup>f</sup>, Swastik Mondal<sup>eg</sup>, K. V. Adarsh<sup>d</sup>, Dibyajyoti Ghosh<sup>ch</sup>, K. D. M. Rao<sup>a\*</sup>

<sup>a</sup> School of Applied & Interdisciplinary Sciences, Indian Association for the Cultivation of Science, Jadavpur, Kolkata 700032, India, E-mail: saiskdmrao@iacs.res.in (K. D. M. R.).

<sup>b</sup> Present Address: Department of Mechanical and Aerospace Engineering, University of California, Los Angeles, California 90095, USA

<sup>c</sup> Department of Chemistry, Indian Institute of Technology, Delhi, Hauz Khas, New Delhi 110016, India

<sup>d</sup> Department of Physics, Indian Institute of Science Education and Research, Bhopal, Madhya Pradesh 462066, India

<sup>e</sup> CSIR-Central Glass and Ceramic Research Institute, Kolkata 700032, India

<sup>f</sup> Hybrid Solar Cells, Faculty of Engineering and Natural Sciences, P.O. Box 541, FI-33014 Tampere University, Finland

<sup>g</sup> Academy of Scientific and Innovative Research (AcSIR), Ghaziabad 201002, India

<sup>h</sup> Department of Materials Science and Engineering, Indian Institute of Technology, Delhi, Hauz Khas, New Delhi 110016, India

## Table of content

|                                                                                                                                                                                       |                          |
|---------------------------------------------------------------------------------------------------------------------------------------------------------------------------------------|--------------------------|
| 1. Schematic of the synthesis process of 2DCs <sub>3</sub> Bi <sub>2</sub> Br <sub>3</sub> I <sub>5.2</sub> microcrystals.....                                                        | <b>Figure S1</b>         |
| 2. Crystal structure refinement parameters of 2D Cs <sub>3</sub> Bi <sub>2</sub> Br <sub>3</sub> I <sub>5.2</sub> MC.....                                                             | <b>Table S1</b>          |
| 3. Fractional atomic coordinates of 2D Cs <sub>3</sub> Bi <sub>2</sub> Br <sub>3</sub> I <sub>5.2</sub> MC.....                                                                       | <b>Table S2</b>          |
| 4. Anisotropic displacement parameters of 2D Cs <sub>3</sub> Bi <sub>2</sub> Br <sub>3</sub> I <sub>5.2</sub> MC.....                                                                 | <b>Table S3</b>          |
| 5. Bond distance parameter of 2D Cs <sub>3</sub> Bi <sub>2</sub> Br <sub>3</sub> I <sub>5.2</sub> MC from SCXRD.....                                                                  | <b>Table S4</b>          |
| 6. Bond angle parameter of 2D Cs <sub>3</sub> Bi <sub>2</sub> Br <sub>3</sub> I <sub>5.2</sub> MC from SCXRD.....                                                                     | <b>Table S5</b>          |
| 7. Powder XRD and TEM SEAD pattern for structural characterization.....                                                                                                               | <b>Figure S2</b>         |
| 8. Time-dependent Powder XRD for stability measurements.....                                                                                                                          | <b>Figure S3</b>         |
| 9. Structure of pristine and I-vacant Cs <sub>3</sub> Bi <sub>2</sub> Br <sub>3</sub> I <sub>6</sub> , used in DFT calculations.....                                                  | <b>Figure S4</b>         |
| 10. The side and top view of pristine Cs <sub>3</sub> Bi <sub>2</sub> Br <sub>3</sub> I <sub>6</sub> .....                                                                            | <b>Figure S5</b>         |
| 11. Bond lengths and angles from DFT calculation.....                                                                                                                                 | <b>Table S6 &amp; S7</b> |
| 12. Band structure plot for Cs <sub>3</sub> Bi <sub>2</sub> Br <sub>3</sub> I <sub>6</sub> Cs <sub>3</sub> Bi <sub>2</sub> Br <sub>3</sub> I <sub>5</sub> considering PBE + SOC ..... | <b>Figure S6</b>         |
| 13. Simulated absorbance spectra from DFT calculation .....                                                                                                                           | <b>Figure S7</b>         |
| 14. Thermal fluctuation of Cs <sub>3</sub> Bi <sub>2</sub> Br <sub>3</sub> I <sub>6</sub> over a 3.5 ps timeframe.....                                                                | <b>Video S1</b>          |
| 15. Thermal fluctuation of Cs <sub>3</sub> Bi <sub>2</sub> Br <sub>3</sub> I <sub>5</sub> over a 3.5 ps timeframe.....                                                                | <b>Video S2</b>          |
| 16. Evolution of potential energy microcanonical ensemble .....                                                                                                                       | <b>Figure S8</b>         |
| 17. Root Mean Square Fluctuation of overall material over the 3.5 ps time.....                                                                                                        | <b>Figure S9</b>         |
| 18. Radial distribution of iodine atoms with respect to Bi atoms.....                                                                                                                 | <b>Figure S10</b>        |
| 19. The histogram distribution plots of different bond distances .....                                                                                                                | <b>Figure S11</b>        |
| 20. Thermal stability of Cs <sub>3</sub> Bi <sub>2</sub> Br <sub>3</sub> I <sub>6</sub> and Cs <sub>3</sub> Bi <sub>2</sub> Br <sub>3</sub> I <sub>5</sub> .....                      | <b>Section S1</b>        |
| 21. Tauc plot for bandgap estimation from uv-vis abs spectra.....                                                                                                                     | <b>Figure S12</b>        |
| 22. Band gap calculations from UV-Vis abs spectra.....                                                                                                                                | <b>Section S2</b>        |
| 23. UV-vis absorption and PL spectrum of Cs <sub>3</sub> Bi <sub>2</sub> Br <sub>3</sub> I <sub>5.2</sub> in energy scale.....                                                        | <b>Figure S13</b>        |
| 24. Thermogravimetric analysis of 2D Cs <sub>3</sub> Bi <sub>2</sub> Br <sub>3</sub> I <sub>5.2</sub> MCs.....                                                                        | <b>Figure S14</b>        |
| 25. XPS survey spectra of 2D Cs <sub>3</sub> Bi <sub>2</sub> Br <sub>3</sub> I <sub>5.2</sub> .....                                                                                   | <b>Figure S15</b>        |
| 26. XPS core level spectra of 2D Cs <sub>3</sub> Bi <sub>2</sub> Br <sub>3</sub> I <sub>5.2</sub> .....                                                                               | <b>Figure S16</b>        |
| 27. Estimation of stoichiometric ratios of constituent atoms from XPS spectra....                                                                                                     | <b>Table S8</b>          |
| 28. UPS spectra of 2D Cs <sub>3</sub> Bi <sub>2</sub> Br <sub>3</sub> I <sub>5.2</sub> MC.....                                                                                        | <b>Figure S17</b>        |
| 29. Table for electronic band level calculations.....                                                                                                                                 | <b>Table S9</b>          |

|                                                                                                                           |                   |
|---------------------------------------------------------------------------------------------------------------------------|-------------------|
| 30. Raman spectra of 2D-Cs <sub>3</sub> Bi <sub>2</sub> Br <sub>3</sub> I <sub>5.2</sub> MC.....                          | <b>Figure S18</b> |
| 31. Details of Raman spectra of Cs <sub>3</sub> Bi <sub>2</sub> Br <sub>3</sub> I <sub>5.2</sub> .....                    | <b>Table S10</b>  |
| 32. Details of the calculation of trap density ( $\eta_{trap}$ ) and mobility ( $\mu$ ).....                              | <b>Section S3</b> |
| 33. Details of photoconductivity and diffusion length ( $L_D$ ) calculation.....                                          | <b>Section S4</b> |
| 34. Modified Hecht equation fitting under various light intensity .....                                                   | <b>Figure S19</b> |
| 35. Photocurrent of 2D-Cs <sub>3</sub> Bi <sub>2</sub> Br <sub>3</sub> I <sub>5.2</sub> MC-based photodetector .....      | <b>Figure S20</b> |
| 36. Photodetector's figure of merit (FOM) estimation .....                                                                | <b>Section S5</b> |
| 37. Transient photocurrent stability of Cs <sub>3</sub> Bi <sub>2</sub> Br <sub>3</sub> I <sub>5.2</sub> under 450nm..... | <b>Figure S21</b> |
| 38. Transient photoresponse at different wavelength and intensity....                                                     | <b>Figure S22</b> |
| 39. Literature comparison of self-powered photodetector .....                                                             | <b>Table S11</b>  |
| 40. Table of rise & decay time of photoresponse under 450 and 650 nm light....                                            | <b>Table S12</b>  |

## Experimental section

**Synthesis of  $\text{Cs}_3\text{Bi}_2\text{Br}_3\text{I}_{5.2}$  MCs:** The synthesis of facet-oriented 2D- $\text{Cs}_3\text{Bi}_2\text{Br}_3\text{I}_{5.2}$  microcrystals (MCs) is performed through a modified hot-spin casting method, as illustrated in **Figure S1**. The precursor solution ( $0.5 \text{ M.L}^{-1}$ ) in 2 ml of DMSO is prepared by mixing CsI (259.8 mg),  $\text{BiBr}_3$  (148.7 mg),  $\text{BiI}_3$  (194.4 mg), and AgI (29.3 mg) powders, followed by stirring (900 rpm) in a closed vial at  $70^\circ\text{C}$  for 16 hours. The fully dissolved precursor solutions are cooled to room temperature and used for the synthesis of 2D- $\text{Cs}_3\text{Bi}_2\text{Br}_3\text{I}_{5.2}$  MCs. The glass substrates of  $2.5 \times 2.5 \text{ cm}^2$  area are sequentially ultrasonicated for 10 minutes in soap water, milli-Q water, acetone, and IPA, respectively. Subsequently, the UV-ozone-treated glass substrate is pre-heated at  $150^\circ\text{C}$  for 8 minutes, followed by spin coating (two-step) with the precursor solution onto cleaned glass substrates (see **Figures S1a** and **S1b**). The precursor solutions are spin-coated (Apex Instruments: SpinNXGP1) on the pre-heated glass substrates. The synthesis of 2D- $\text{Cs}_3\text{Bi}_2\text{Br}_3\text{I}_{5.2}$  MCs involves a two-step spin coating process. The first step of spin coating involves spinning at 200 RPM only for 20 seconds, and the second spin coating is performed at 1000 RPM for 60 seconds. Heat transfer from the pre-heated substrate to the precursor solution during spin coating generated heterogeneous nucleation centers at the substrate-solution interface, facilitating subsequent growth. After spin coating, the substrates underwent vacuum drying for 24 hours (see **Figure S1c**), promoting the growth of nucleation centers submerged in a super-saturated precursor solution to form the facet-oriented 2D- $\text{Cs}_3\text{Bi}_2\text{Br}_3\text{I}_{5.2}$  MCs. However, the post-heating process to dry the precursor solution led to the formation of non-perovskite and impurity phases due to the mismatch in halide size and electronegativity. Vacuum drying is essential to forming perovskite MCs and mitigating impurity phase formation. Notably, vacuum-assisted slow solvent evaporation extended the time for nuclei center growth, resulting in 2D- $\text{Cs}_3\text{Bi}_2\text{Br}_3\text{I}_6$  MCs featuring iodine vacancies, with dimensions ranging between 30 and  $200 \mu\text{m}$  (see **Figure S1d**). The modified hot-spin casting

method provides precise control over crystal size (20–300  $\mu\text{m}$ ) and facet orientation, enabling the direct synthesis of 2D- $\text{Cs}_3\text{Bi}_2\text{Br}_3\text{I}_{5.2}$  without impurity phases.

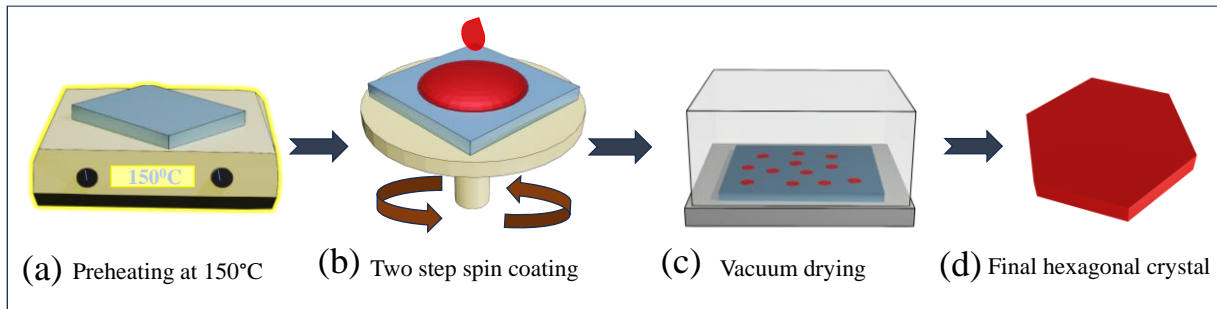

**Figure S1:** Schematic diagram of the steps involved in the synthesis of 2D- $\text{Cs}_3\text{Bi}_2\text{Br}_3\text{I}_{5.2}$  MCs. (a) The glass substrate is preheated at 150°C. (b) Two-step spin coating on the preheated substrate. (c) Slow vacuum drying in an evacuated chamber. (d) Schematic representation of hexagonal 2D- $\text{Cs}_3\text{Bi}_2\text{Br}_3\text{I}_{5.2}$  MCs.

**Characterization of iodide deficient  $\text{Cs}_3\text{Bi}_2\text{Br}_3\text{I}_{5.2}$  MCs:** Single crystal X-ray diffraction (XRD) analysis of  $\text{Cs}_3\text{Bi}_2\text{Br}_3\text{I}_{5.2}$  MCs is performed at room temperature, irradiating with Mo  $\text{K}\alpha$  ( $\lambda = 0.7107 \text{ \AA}$ ) from a Bruker D8 VENTURE 431 with a  $1\mu\text{S}$  3.0 microfocus X-ray source. Diffracted data is collected through a CMOS detector equipped with the Bruker D8 VENTURE using the software package APEX III. Additionally, Powder X-ray diffraction patterns of  $\text{Cs}_3\text{Bi}_2\text{Br}_3\text{I}_{5.2}$  MCs are obtained using Bruker AXS D8 Advanced equipment (40 kV, 40 mA, wavelength  $\sim 0.15406 \text{ nm}$ ) with Cu  $\text{K}\alpha$  radiation. Scanning electron microscopy (SEM) and EDX elemental mapping measurements are executed with FESEM (JEOL JSM-7500F). SAED patterns are measured with the transmission electron microscope (JEOL, JEM 2100 F). Defused reflectance spectra are recorded using Agilent carry 5000 UV-VIS- NIR and converted to UV-vis absorption spectra using  $F(\alpha) = \frac{k}{s} = \frac{(1-R_\infty)^2}{2R_\infty}$ .<sup>1</sup> Temperature-dependent photoluminescence (PL) spectra and Raman spectra are collected by using the Raman Triple spectrometer Jobin-Yvon T64000 by exciting the sample with Nd:YAG green laser (532.5 nm,  $\sim 10 \mu\text{W}$  power). The confocal microscope images are captured using Zeiss LSM 800 with a GaAsP PMT detector with an excitation wavelength of 561 nm. X-ray photoelectron

spectroscopy (XPS) and Ultra-photoelectron Spectroscopy (UPS) measurements are carried out using a PHI 500 Versa Probe-III instrument with a photon energy of 21.2 eV.

**Fabrication of Cs<sub>3</sub>Bi<sub>2</sub>Br<sub>3</sub>I<sub>5.2</sub> MC-based photodetector:** The fabrication of the Cs<sub>3</sub>Bi<sub>2</sub>Br<sub>3</sub>I<sub>5.2</sub> MC-based photodetector involves the use of an asymmetric gap electrode (ITO/Au), where Au electrodes are deposited on etched ITO glass through thermal evaporation using a Hind High Vacuum Company Private Limited system (Model: 12A4D). Micro imprint lithography is employed to transfer Cs<sub>3</sub>Bi<sub>2</sub>Br<sub>3</sub>I<sub>5.2</sub> MCs onto the asymmetric gap electrode, utilizing a thick PDMS mold and a few drops of isopropanol (IPA) to ensure efficient transfer onto the substrate. The active area of the photodetector is approximately  $890 \times 10^{-12} \text{ m}^2$ . Current-voltage characteristics and photocurrent measurements are performed using a Keithley 2634B system connected to a Lakeshore PS-100 probe station. Wavelength-dependent photocurrent measurements are conducted using an F4 spectral illumination system, while transient photo-response is measured by modulating light intensity at different frequencies with a Scientific Instruments SM5070 function generator connected to white LEDs. I-V measurements for modified Hecht equation are carried out in a symmetric in-plane geometry (Au/MoO<sub>3</sub>/Cs<sub>3</sub>Bi<sub>2</sub>Br<sub>3</sub>I<sub>5.2</sub>/MoO<sub>3</sub>/Au), with 20 nm MoO<sub>3</sub> layer and 50 nm Au electrodes separated by 60  $\mu\text{m}$ . A  $95 \times 180 \mu\text{m}^2$  device area was used for transient photocurrent measurements.

**Computational Methodology:** All DFT-based simulations employed the widely used Vienna Ab Initio Simulation Package (VASP), incorporating a Projected Augmented Wave (PAW) methodology for ion-electron interactions.<sup>2-4</sup> The selected cut-off energy for the plane wave basis set was established at 520 eV to facilitate structural relaxation, with the geometry adjusted until the interionic force diminished below 0.01 eV/Å.<sup>5</sup> The semi-local Perdew-Burke-Ernzerhof (PBE) function within the framework of Generalized Gradient Approximation (GGA) is adopted for the exchange-correlation interaction in the simulations.<sup>6</sup> A  $\Gamma$ -centered  $4 \times 4 \times 2$  and  $9 \times 9 \times 5$  Monkhorst-Pack k-point mesh was utilized for cell relaxation and

electronic properties calculation, respectively.<sup>7</sup> Additionally, static structural bond-parameter assessments are conducted using VESTA software.<sup>8</sup> Electronic property analyses for  $\text{Cs}_3\text{Bi}_2\text{Br}_3\text{I}_6$  and  $\text{Cs}_3\text{Bi}_2\text{Br}_3\text{I}_5$  are performed through SUMO.<sup>9</sup> For ab initio molecular dynamics (AI-MD) simulations, we constructed a  $2 \times 2 \times 2$  supercell comprising 8 formula units and a total of 112 atoms and 104 atoms for pristine  $\text{Cs}_3\text{Bi}_2\text{Br}_3\text{I}_6$  and  $\text{Cs}_3\text{Bi}_2\text{Br}_3\text{I}_5$ . A single Gamma-point mesh was utilized, along with a time step of 1 fs and a plane-wave energy cutoff of 400 eV. The AIMD simulations began with the DFT-optimized structure, which was incrementally heated to 300 K through repeated velocity rescaling over 3 ps. To ensure thermal equilibrium, an additional 4 ps of trajectory data was generated using the canonical ensemble. Finally, we performed 3.5 ps of simulations under the microcanonical ensemble, and the resulting trajectory was employed for structural dynamics and thermal stability analysis.

**Table S1:** Crystal structure refinement parameters of 2D  $\text{Cs}_3\text{Bi}_2\text{Br}_3\text{I}_{5.2}$  MC using single crystal X-ray diffraction (SCXRD) measurements.

| <b>Empirical formula</b>                          | <b><math>\text{Cs}_3\text{Bi}_2\text{Br}_3\text{I}_{5.2}</math></b> |
|---------------------------------------------------|---------------------------------------------------------------------|
| Formula weight                                    | 1718.84                                                             |
| Temperature/K                                     | 180.15                                                              |
| Crystal system                                    | Trigonal                                                            |
| Space group                                       | P-3m1                                                               |
| a/Å                                               | 8.2207(12)                                                          |
| b/Å                                               | 8.2207(12)                                                          |
| c/Å                                               | 10.104(2)                                                           |
| $\alpha/^\circ$                                   | 90                                                                  |
| $\beta/^\circ$                                    | 90                                                                  |
| $\gamma/^\circ$                                   | 120                                                                 |
| Volume/Å <sup>3</sup>                             | 591.3(2)                                                            |
| Octahedral Volume/Å <sup>3</sup>                  | 33.5601                                                             |
| Z                                                 | 1                                                                   |
| Density (calculated) g/cm <sup>3</sup>            | 4.827                                                               |
| Absorption coefficient ( $\mu$ )/mm <sup>-1</sup> | 31.266                                                              |
| Radiation                                         | MoK $\alpha$ ( $\lambda = 0.71073$ )                                |
| Goodness-of-fit                                   | 1.164                                                               |
| Final R indexes [ $I \geq 2\sigma(I)$ ]           | $R_1 = 0.0184$ , $wR_2 = 0.0425$                                    |
| Final R indexes [all data]                        | $R_1 = 0.0196$ , $wR_2 = 0.0431$                                    |
| Largest diff. peak/hole / e Å <sup>-3</sup>       | 0.73/-0.65                                                          |

**Table S2:** Fractional atomic coordinates ( $\times 10^4$ ) and equivalent isotropic displacement parameters ( $\text{\AA}^2 \times 10^3$ ) of 2D  $\text{Cs}_3\text{Bi}_2\text{Br}_3\text{I}_{5.2}$  MCc,  $U_{eq}$  is defined as 1/3 of the trace of the orthogonalized  $U_{ij}$  tensor.

| Atom | Wyckoff sites | x         | y         | z         | U(eq)*    |
|------|---------------|-----------|-----------|-----------|-----------|
| Bi1  | 2d            | 3333.33   | 6666.67   | 3170.8(3) | 34.32(15) |
| Cs2  | 2d            | 6666.67   | 13333.33  | 1788.5(9) | 72.1(3)   |
| Cs1  | 1b            | 0         | 10000     | 5000      | 77.7(4)   |
| I1   | 6i            | 1647.2(4) | 8352.8(4) | 1634.3(6) | 66.8(3)   |
| Br1  | 3f            | 5000      | 5000      | 5000      | 84.9(4)   |

**Table S3:** Anisotropic displacement parameters ( $\text{\AA}^2 \times 10^3$ ) for 2D- $\text{Cs}_3\text{Bi}_2\text{Br}_3\text{I}_{5.2}$  MC Anisotropic displacement factor exponent takes the form:  $-2\pi^2[h^2a^{*2}U_{11}+2hka^*b^*U_{12}+\dots]$ .

| Atom | U11       | U22       | U33     | U23       | U13       | U12      |
|------|-----------|-----------|---------|-----------|-----------|----------|
| Bi1  | 35.91(17) | 35.91(17) | 31.1(2) | 0         | 0         | 17.95(9) |
| Cs2  | 71.4(4)   | 71.4(4)   | 73.7(6) | 0         | 0         | 35.7(2)  |
| Cs1  | 81.2(6)   | 81.2(6)   | 70.8(9) | 0         | 0         | 40.6(3)  |
| I1   | 73.6(4)   | 73.6(4)   | 66.9(8) | 10.94(14) | 10.94(14) | 47.1(4)  |
| Br1  | 106.3(8)  | 106.3(8)  | 74.8(8) | 17.2(3)   | -17.2(3)  | 77.7(9)  |

**Table S4:** Bond distance parameters ( $\text{\AA}$ ) for 2D- $\text{Cs}_3\text{Bi}_2\text{Br}_3\text{I}_{5.2}$  microcrystal

| $\text{Cs}_3\text{Bi}_2\text{Br}_3\text{I}_{5.22}$ |                                      |                         |
|----------------------------------------------------|--------------------------------------|-------------------------|
| Atom1                                              | Atom2                                | Length ( $\text{\AA}$ ) |
| Bi1(1)                                             | I1(1)                                | 2.8590(6)               |
| Bi1(1)                                             | I1(2)                                | 2.8590(6)               |
| Bi1(1)                                             | Br1(1)                               | 3.0079(4)               |
| Bi1(1)                                             | Br1(2)                               | 3.0079(4)               |
| Cs2(1)                                             | I1(1), I1(3), I1(4), I1(6) and I1(7) | 4.1134(6)               |
| Cs2(1)                                             | I1(5), I1(8), I1(4), I1(6) and I1(7) | 4.2101(11)              |
| Cs2(1)                                             | Br1                                  | 4.0201(9)               |
| Cs1                                                | I(1)                                 | 4.1311(9)               |
| Cs1                                                | Br1                                  | 4.1104(6)               |

**Table S5:** Bond angle parameters ( $\text{\AA}$ ) for 2D  $\text{Cs}_3\text{Bi}_2\text{Br}_3\text{I}_{5.2}$  microcrystal

| $\text{Cs}_3\text{Bi}_2\text{Br}_3\text{I}_{5.22}$ |                |
|----------------------------------------------------|----------------|
| Atom1-Atom2 -Atom3                                 | Angle (Degree) |
| Bi1-Br1-Bi1                                        | 180.0000(0)    |
| I1-Bi1-Br1                                         | 174.967(19)    |



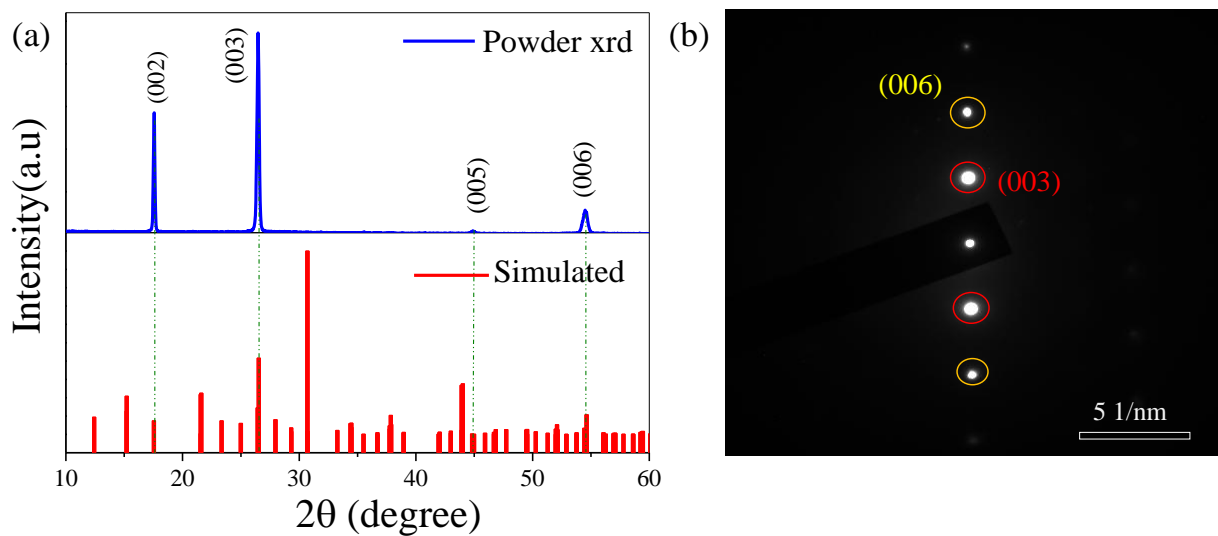

**Figure S2.** Structural Characterization of  $\text{Cs}_3\text{Bi}_2\text{Br}_3\text{I}_{5.2}$  MCs. (a) Experimental powder XRD patterns at room temperature of 2D  $\text{Cs}_3\text{Bi}_2\text{Br}_3\text{I}_{5.2}$  compared with simulated XRD patterns. (b) TEM SAED pattern of 2D  $\text{Cs}_3\text{Bi}_2\text{Br}_3\text{I}_{5.2}$  MCs providing single crystal nature.

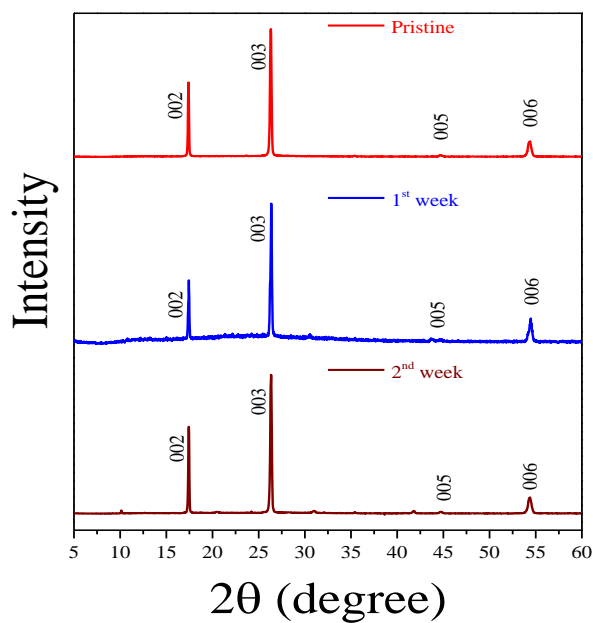

**Figure S3.** Time-dependent XRD of 2D- $\text{Cs}_3\text{Bi}_2\text{Br}_3\text{I}_{5.2}$  MCs after exposure to the ambient environment for two weeks

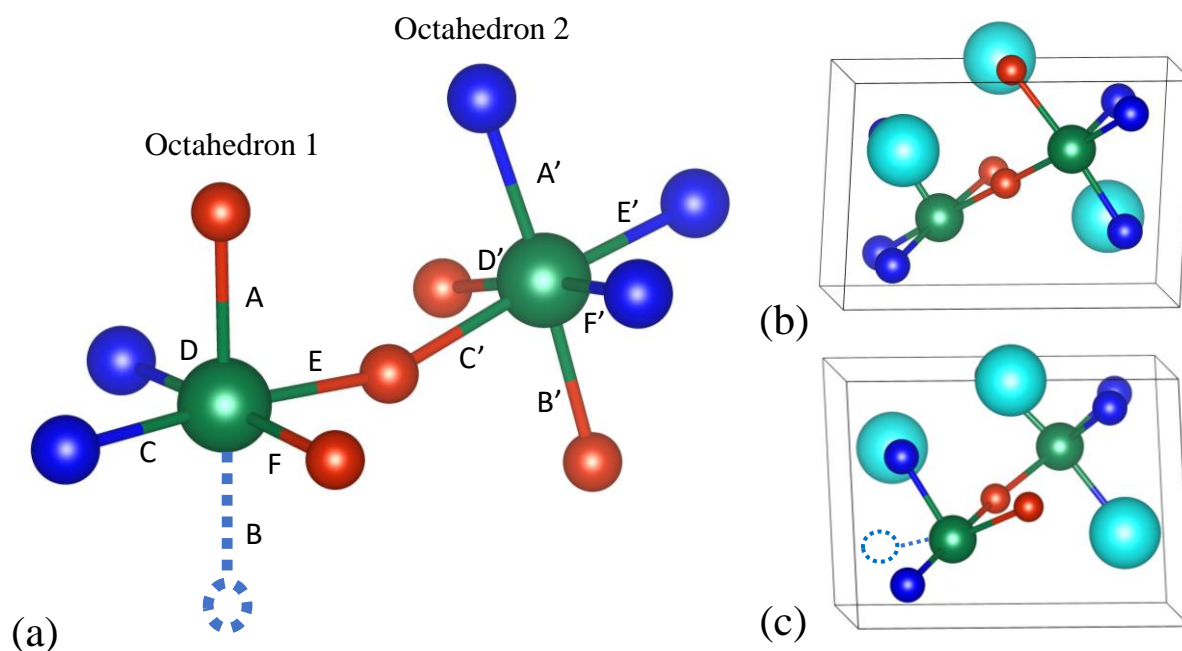

**Figure S4.** (a) The connected octahedra are shown after creating an I-vacancy (shown as dotted lines). Capital alphabets represent the nomenclature of bonds, and the bond angles are determined by the bonds involved in forming that particular angle. For example, the inter-octahedral angle involves the E and C' bonds, thus named as E-C'. (b) and (c) depict schematics of pristine  $\text{Cs}_3\text{Bi}_2\text{Br}_3\text{I}_6$  and I-vacancy  $\text{Cs}_3\text{Bi}_2\text{Br}_3\text{I}_6$ , respectively.

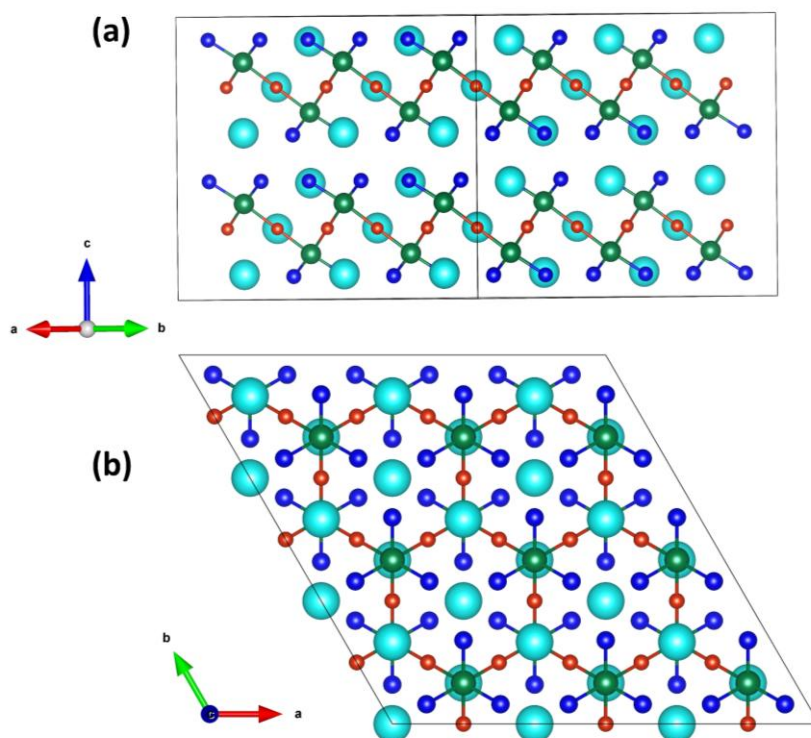

**Figure S5.** The (a) side view and (b) top view of pristine  $\text{Cs}_3\text{Bi}_2\text{Br}_3\text{I}_6$ . (a) shows that the iodine atoms occupy positions along the edges of the layered structure, and the bromine atoms form bonds with neighboring octahedra. (b) shows the symmetrical arrangement of all iodine and bromine maintaining an equivalent chemical environment, allowing us to select any iodine atom for removal to model the iodine vacancy.

**Table S6:** Structural parameters include bond lengths of optimized (using DFT-based simulation) geometry of  $\text{Cs}_3\text{Bi}_2\text{Br}_3\text{I}_6$  and  $\text{Cs}_3\text{Bi}_2\text{Br}_3\text{I}_5$  MCs at 0K. Follow **Figure S4a** for the nomenclature of the bond and bond angles.

|                 | Octahedron 1 |          |                 | Octahedron 2 |          |
|-----------------|--------------|----------|-----------------|--------------|----------|
| Bond length (Å) | Pristine     | I-defect | Bond length (Å) | Pristine     | I-defect |
| A               | 2.98         | 3.11     | A'              | 2.94         | 3.03     |
| B               | 2.94         | --       | B'              | 2.98         | 2.98     |
| C               | 2.94         | 2.96     | C'              | 2.98         | 3.03     |
| D               | 2.94         | 2.96     | D'              | 2.98         | 3.03     |
| E               | 2.98         | 2.98     | E'              | 2.94         | 2.96     |
| F               | 2.98         | 2.98     | F'              | 2.94         | 3.96     |

**Table S7:** Structural parameters include bond angles of optimized (using DFT-based simulation) geometry of  $\text{Cs}_3\text{Bi}_2\text{Br}_3\text{I}_6$  and  $\text{Cs}_3\text{Bi}_2\text{Br}_3\text{I}_5$  2D-MHP MCs at 0K. Follow **Figure S4a** for the nomenclature of the bond and bond angles.

| Inter-Octahedral | Octahedron 1 |          |                | Octahedron 2 |          |
|------------------|--------------|----------|----------------|--------------|----------|
| Bond Angle (°)   | Pristine     | I-defect | Bond Angle (°) | Pristine     | I-defect |
| A-B              | 175.66       | --       | A'-B'          | 175.66       | 175.99   |
| C-E              | 175.66       | 175.65   | C'-E'          | 175.66       | 173.49   |
| D-F              | 175.66       | 175.65   | D'-F'          | 175.66       | 173.49   |
| Inter-Octahedral | Pristine     |          |                | I-defect     |          |
| E-C'             | 180          |          |                | 160.61       |          |

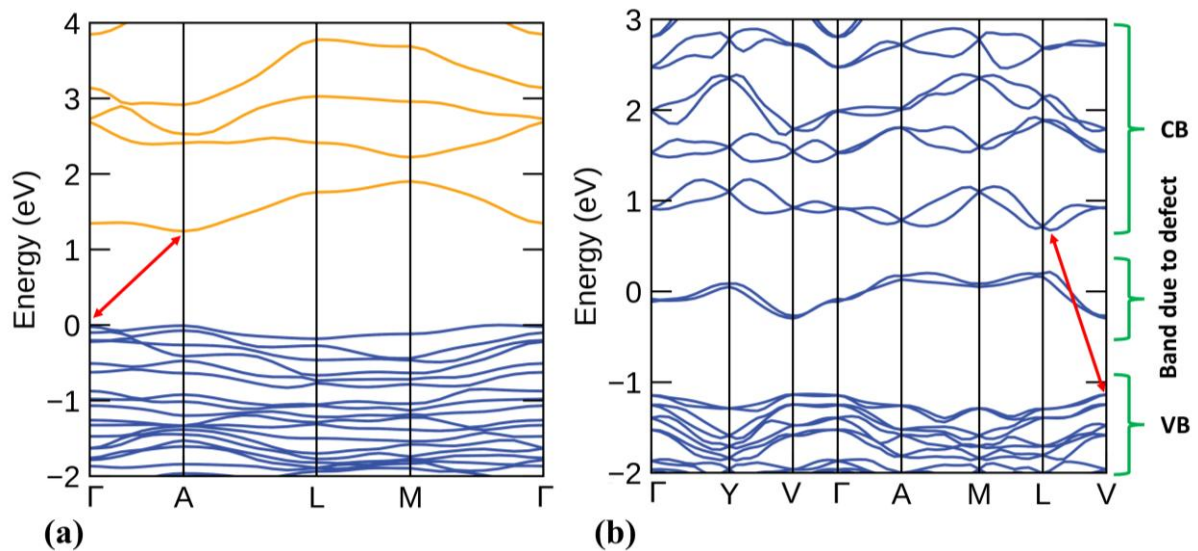

**Figure S6.** Band structure plot for (a) pristine  $\text{Cs}_3\text{Bi}_2\text{Br}_3\text{I}_6$  and (b)  $\text{Cs}_3\text{Bi}_2\text{Br}_3\text{I}_5$  considering PBE functional with spin-orbit coupling effects. The systematic underestimation of the band gap (compared to Figure 2) appears due to the usage of the semi-local PBE exchange-correlation functional in these simulations.

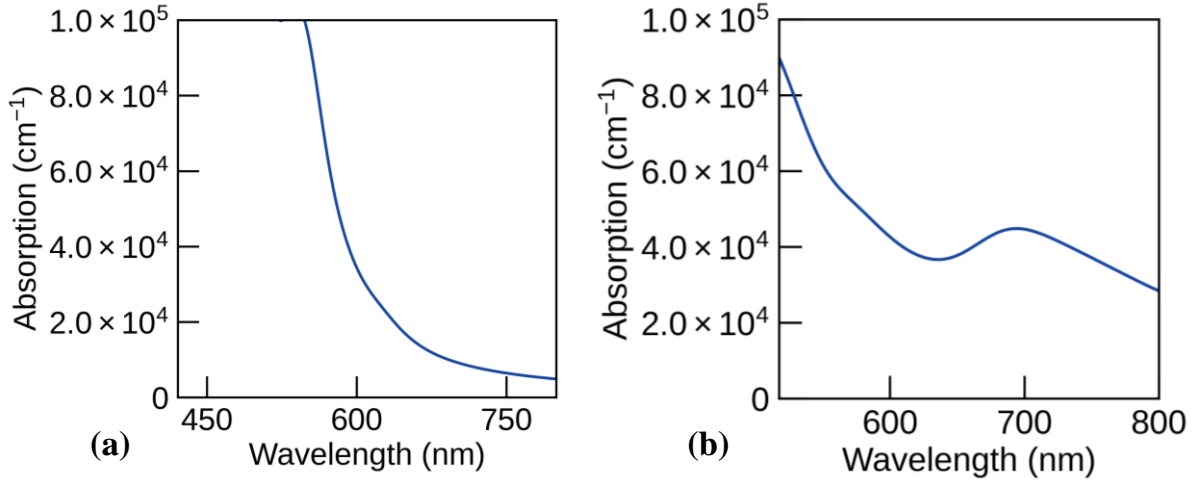

**Figure S7:** Simulated absorption spectra of pristine  $\text{Cs}_3\text{Bi}_2\text{Br}_3\text{I}_6$  and  $\text{Cs}_3\text{Bi}_2\text{Br}_3\text{I}_5$  with an I-vacancy

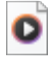

I6.mp4

**Video S1.** Thermal fluctuation of pristine  $\text{Cs}_3\text{Bi}_2\text{Br}_3\text{I}_6$  over a 3.5 ps timeframe.

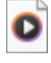

I5.mp4

**Video S1.** Thermal fluctuation of pristine  $\text{Cs}_3\text{Bi}_2\text{Br}_3\text{I}_5$  over a 3.5 ps timeframe.

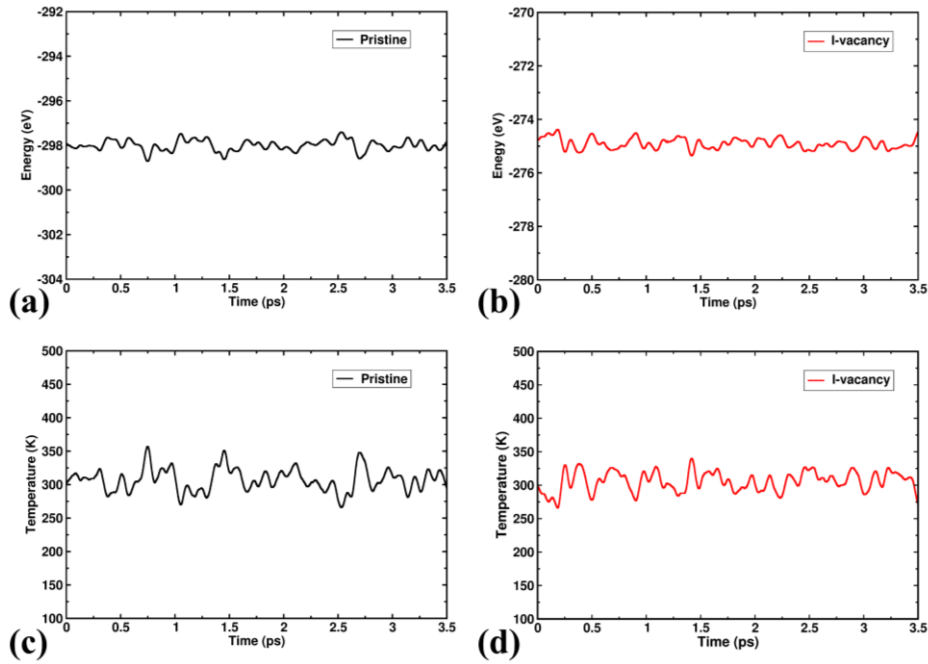

**Figure S8.** Evolution of potential energy over 3.5 ps trajectories in a microcanonical ensemble of (a) pristine ( $\text{Cs}_3\text{Bi}_2\text{Br}_3\text{I}_6$ ) and (b) I-vacancy ( $\text{Cs}_3\text{Bi}_2\text{Br}_3\text{I}_5$ ) materials. Similarly, temperature fluctuation over the trajectories for (c) pristine ( $\text{Cs}_3\text{Bi}_2\text{Br}_3\text{I}_6$ ) and (d) I-vacancy ( $\text{Cs}_3\text{Bi}_2\text{Br}_3\text{I}_5$ ) materials.

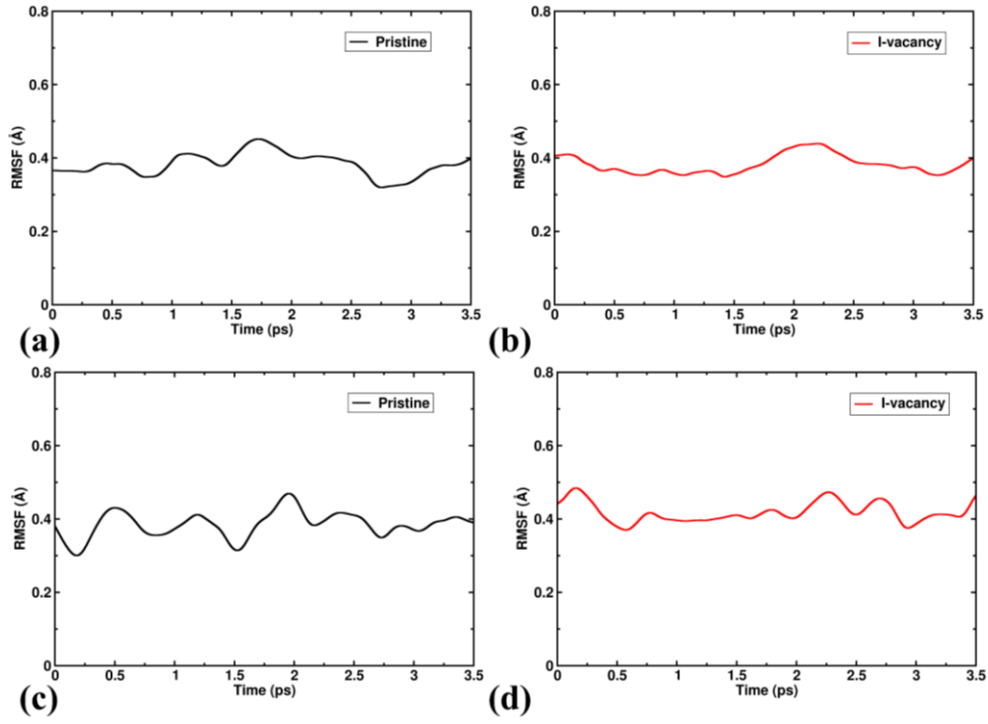

**Figure S9.** Root Mean Square Fluctuation (RMSF) of overall material over the 3.5 ps time for (a) pristine ( $\text{Cs}_3\text{Bi}_2\text{Br}_3\text{I}_6$ ) and (b) I-vacancy ( $\text{Cs}_3\text{Bi}_2\text{Br}_3\text{I}_5$ ) materials. RMSF of Cs atoms over the trajectories for (c) pristine ( $\text{Cs}_3\text{Bi}_2\text{Br}_3\text{I}_6$ ) and (d) I-vacancy ( $\text{Cs}_3\text{Bi}_2\text{Br}_3\text{I}_5$ ) materials.

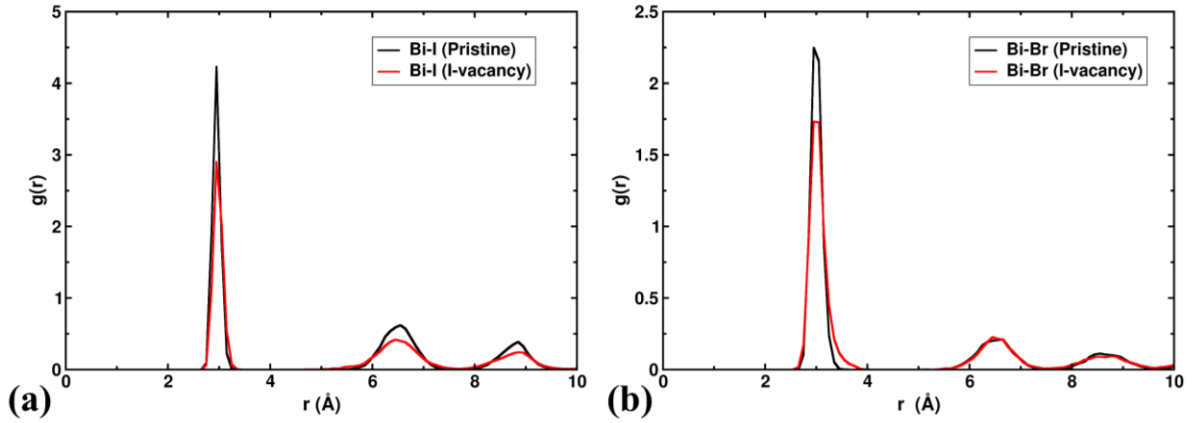

**Figure S10.** Radial distribution of iodine atoms with respect to Bi atoms for (a) pristine ( $\text{Cs}_3\text{Bi}_2\text{Br}_3\text{I}_6$ ) and I-vacancy materials ( $\text{Cs}_3\text{Bi}_2\text{Br}_3\text{I}_5$ ). Similarly, the radial distribution of bromine atoms with respect to bismuth atoms for (b) pristine ( $\text{Cs}_3\text{Bi}_2\text{Br}_3\text{I}_6$ ) and I-vacancy materials ( $\text{Cs}_3\text{Bi}_2\text{Br}_3\text{I}_5$ ).

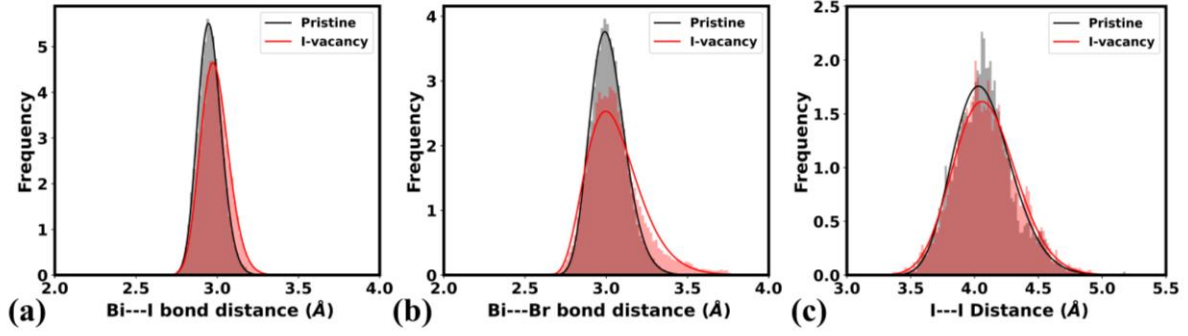

**Figure S11.** The histogram distribution plots of (a) intra-octahedral Bi-Br bond distances, (b) intra-octahedral Bi-I bond distances, and (c) interlayer I-I distance (terminal I-I distance across the layer along the c-direction).

**Section 1:** Both materials show thermal stability, with the potential energy remaining stable throughout the simulation, confirming the preservation of the layered structure over time. The temperature fluctuations are centered around 300 K for both pristine  $\text{Cs}_3\text{Bi}_2\text{Br}_3\text{I}_6$  and  $\text{Cs}_3\text{Bi}_2\text{Br}_3\text{I}_5$  (**Figure S8**). The root means square fluctuations (RMSFs) of overall materials and Cs atoms show very minimal deviation of atoms from the crystal lattice, illustrating the structural stability (**Figure S9**). The radial distribution of bromine and iodine atoms with respect to bismuth atoms (**Figure S10**) and the histogram plot of Bi-I and Bi-Br bond distance over the MD- trajectories (**Figure S11**) shows that all the iodine and bromine atoms maintain their lattice position with minimal deviation (standard deviations (SD) 0.07-0.17 Å). Similarly, the histogram plot of interlayer I...I distance atoms analysis (SD: 0.23/0.24 Å) further supports the thermal stability of these materials (**Figure S11c**).

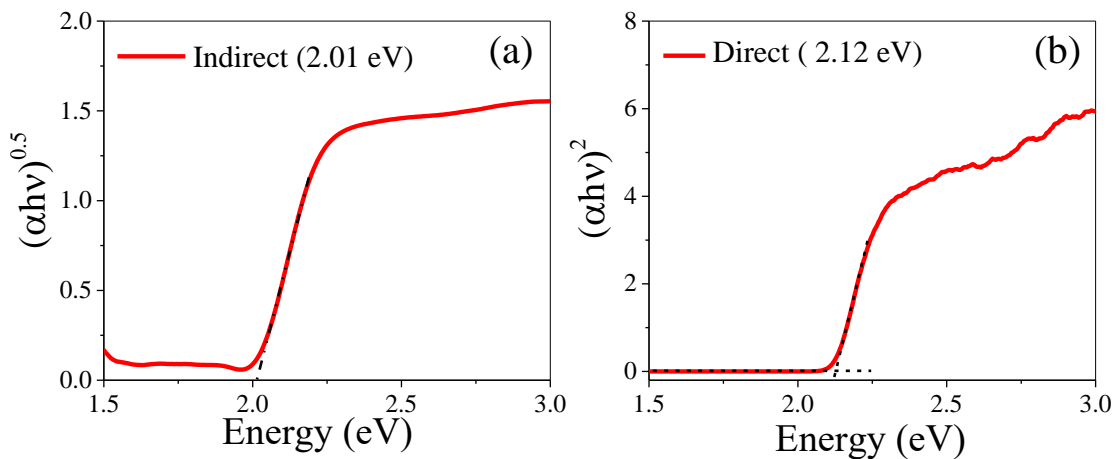

**Figure S12.** Tauc plot from UV-Vis absorption spectra to estimate the (a) indirect and (b) direct bandgap of 2D- $\text{Cs}_3\text{Bi}_2\text{Br}_3\text{I}_{5.2}$  MCs.

**Section 2:** The bandgap of 2D-Cs<sub>3</sub>Bi<sub>2</sub>Br<sub>3</sub>I<sub>5.2</sub> is calculated from Tauc plot analysis following the below equation.<sup>1</sup>

$$(\alpha h\nu)^{\frac{1}{n}} = A(h\nu - E_g) \text{ --- (1)}$$

Where  $\alpha$ ,  $h$ ,  $\nu$ ,  $A$ , and  $E_g$  represent the absorption coefficient (cm<sup>-1</sup>), Planck's constant, frequency, constant, and optical bandgap, respectively. Here,  $n$  is a dimensionless parameter, set to 2 for an indirect bandgap and  $\frac{1}{2}$  for a direct bandgap. From the Tauc plot in **Figure S12**, the indirect and direct bandgaps of 2D-Cs<sub>3</sub>Bi<sub>2</sub>Br<sub>3</sub>I<sub>5.2</sub> are determined as 2.03 and 2.12, respectively, which aligns closely with the reported 2 eV bandgap of 2D-Cs<sub>3</sub>Bi<sub>2</sub>Br<sub>3</sub>I<sub>6</sub>.

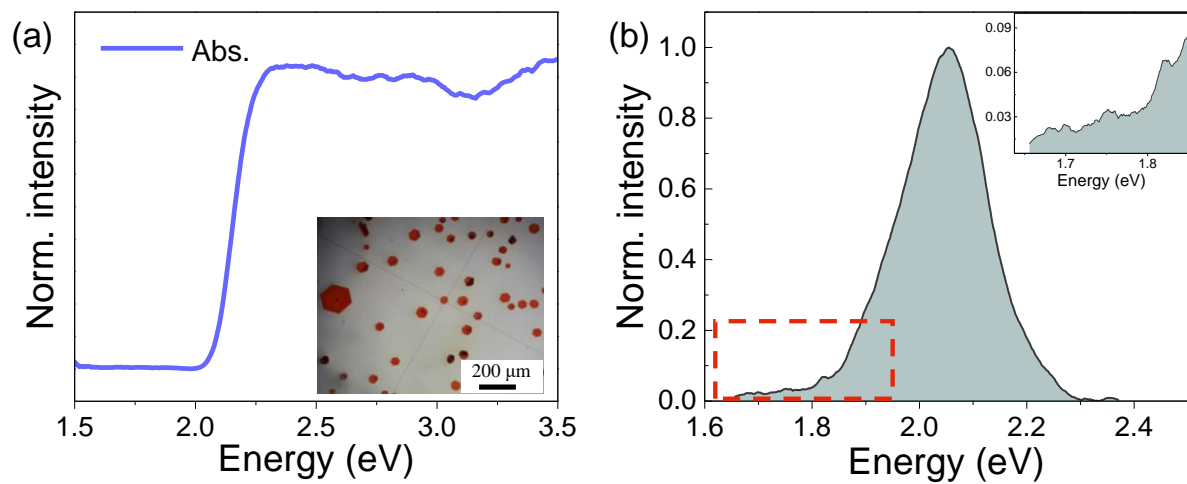

**Figure S13.** (a) UV-vis absorption spectrum of Cs<sub>3</sub>Bi<sub>2</sub>Br<sub>3</sub>I<sub>5.2</sub> microcrystals obtained via diffuse reflectance spectroscopy. Inset: Optical microscopy image of Cs<sub>3</sub>Bi<sub>2</sub>Br<sub>3</sub>I<sub>5.2</sub> MCs on a glass substrate. (b) Photoluminescence (PL) spectrum of Cs<sub>3</sub>Bi<sub>2</sub>Br<sub>3</sub>I<sub>5.2</sub> MCs collected using a microfocus laser system. Inset: Magnified view of the PL spectrum at lower energy.

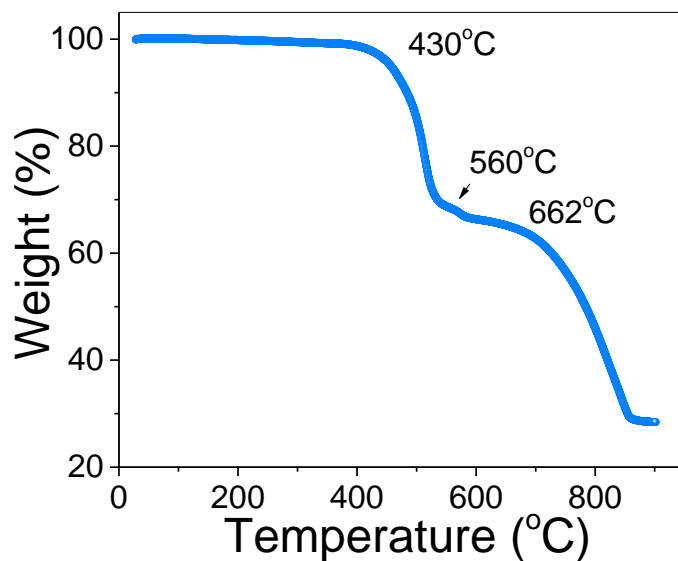

**Figure S14.** Thermogravimetric analysis of 2D  $\text{Cs}_3\text{Bi}_2\text{Br}_3\text{I}_{5.2}$  MCs

Thermogravimetric analysis is performed in a nitrogen atmosphere to evaluate the thermal stability of 2D  $\text{Cs}_3\text{Bi}_2\text{Br}_3\text{I}_{5.2}$  MCs. The study spanned temperatures from 30°C to 900°C, with a heating rate of 10°C per minute, as depicted in **Figure S14**. Initially, weight loss was noted at 430°C, followed by subsequent losses at 560°C, corresponding to the sublimation of  $\text{BiI}_3$  and  $\text{BiBr}_3$ , respectively.<sup>10,11</sup> 33% of the weight loss is observed within this temperature range. A notable decline in weight is observed at 662°C, attributed to the loss of  $\text{CsI}$  material.<sup>11</sup> Thus, the material exhibits commendable thermal stability at elevated temperatures.

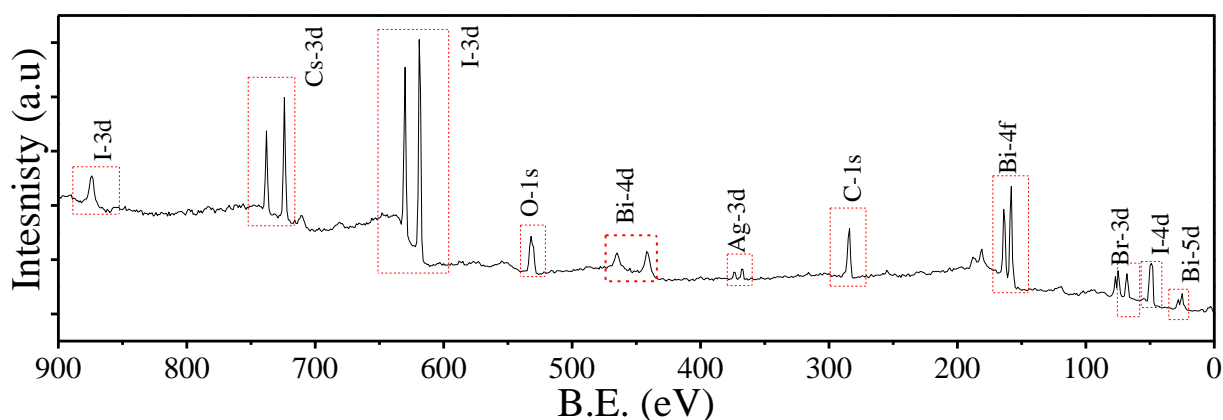

**Figure S15.** X-ray photoelectron spectroscopy (XPS) survey spectra of 2D- $\text{Cs}_3\text{Bi}_2\text{Br}_3\text{I}_{5.2}$  MC.



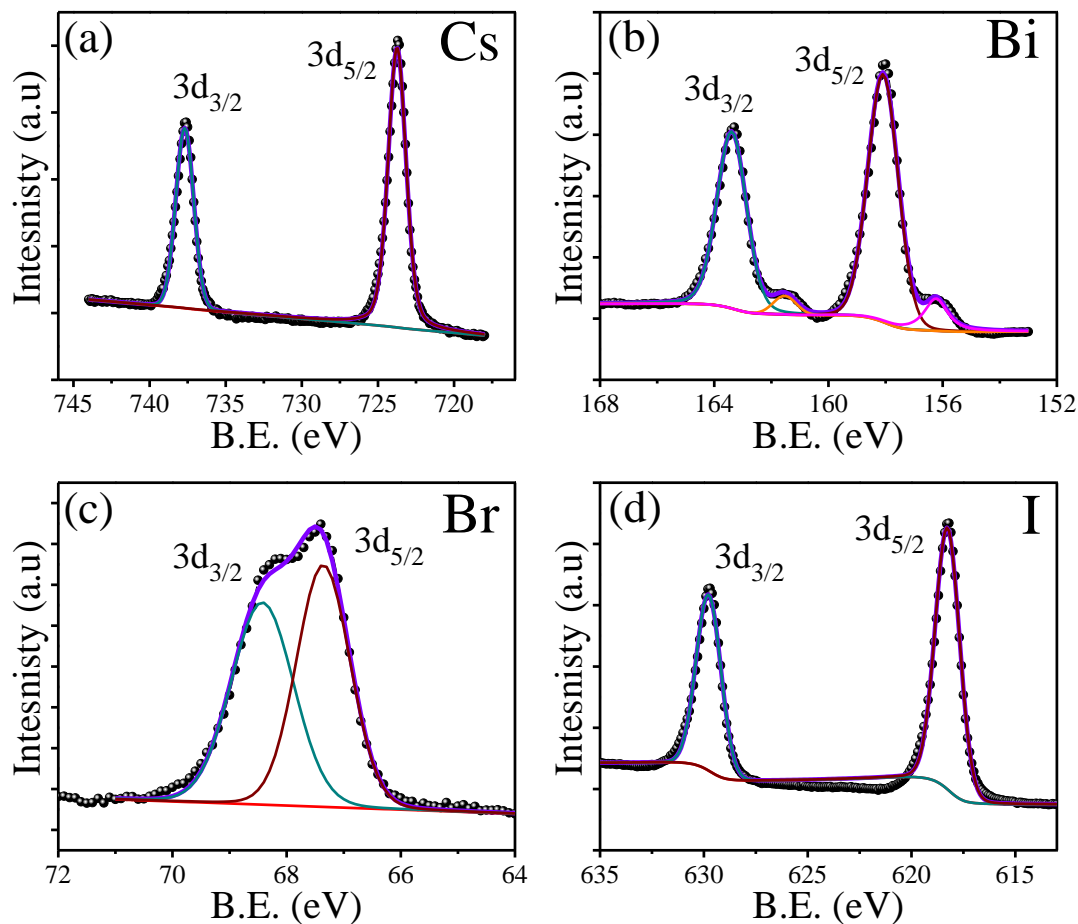

**Figure S16.** Core level XPS spectra of (a) Cs 3d, (b) Bi 4f, (c) Br 3d, and (d) I 3d in 2D- $\text{Cs}_3\text{Bi}_2\text{Br}_3\text{I}_{5.2}$  MC.

**Table S8:** Estimation of atomic ratios of constituent elements in 2D  $\text{Cs}_3\text{Bi}_2\text{Br}_3\text{I}_{5.2}$  from core level XPS spectra

| Ele<br>m-<br>ents | States     | Peak<br>position<br>(eV) | Area    | RSF<br>Value | Total<br>area | No.<br>of<br>scan | Area<br>per<br>single<br>scan | Stoic<br>hio<br>metric<br>ratio | Ideal<br>ratio |
|-------------------|------------|--------------------------|---------|--------------|---------------|-------------------|-------------------------------|---------------------------------|----------------|
| $\text{Cs}^+$     | $3d_{5/2}$ | 724.29                   | 71153.9 | 23.76        | 5450.<br>3    | 5                 | 1090.0                        | 2.27                            | 3              |
|                   | $3d_{3/2}$ | 738.27                   | 40422.4 | 16.46        |               |                   |                               |                                 |                |
| $\text{Bi}^{3+}$  | $4f_{7/2}$ | 158.25                   | 55340.6 | 13.9         | 7683.<br>3    | 8                 | 960.37                        | 2                               | 2              |
|                   | $4f_{5/2}$ | 163.54                   | 40468.7 | 10.93        |               |                   |                               |                                 |                |
| Br-               | $3d_{5/2}$ | 68.42                    | 14344.4 | 1.68         | 20563<br>.9   | 15                | 1370.9                        | 2.9                             | 3              |
|                   | $3d_{3/2}$ | 69.47                    | 12376.4 | 1.16         |               |                   |                               |                                 |                |
| $\text{I}^-$      | $3d_{5/2}$ | 618.33                   | 128448  | 19.87        | 12720<br>.5   | 5                 | 2544.1                        | 5.29                            | 5.2            |
|                   | $3d_{3/2}$ | 629.73                   | 86147.6 | 13.77        |               |                   |                               |                                 |                |

|    |                   |        |         |       |         |    |        |      |   |
|----|-------------------|--------|---------|-------|---------|----|--------|------|---|
| Ag | 3d <sub>5/2</sub> | 367.23 | 29010.4 | 10.66 | 5143.93 | 25 | 205.75 | 0.42 | - |
|    | 3d <sub>3/2</sub> | 373.24 | 17878.3 | 7.38  |         |    |        |      |   |

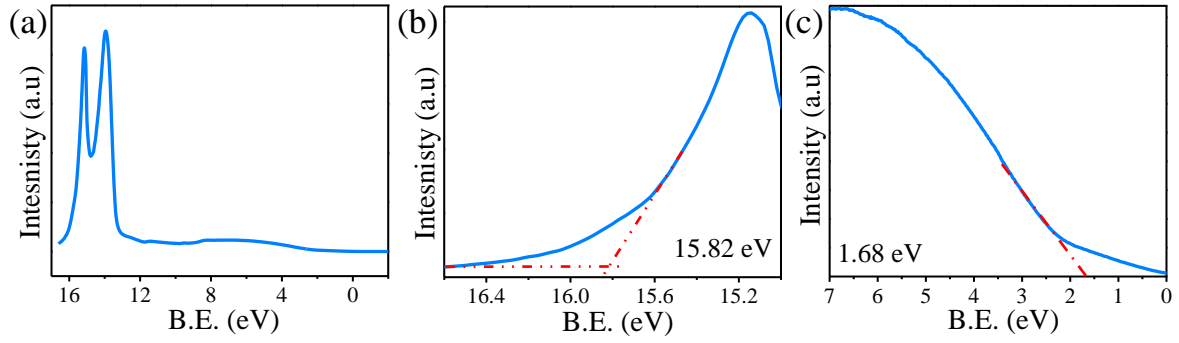

**Figure S17.** (a) UPS survey spectra of iodide deficient 2D Cs<sub>3</sub>Bi<sub>2</sub>Br<sub>3</sub>I<sub>5.2</sub> MCs. (b) High energy UPS cut-off region, (c) low energy UPS tail onset region.

**Table S9:** Electronic Band levels of 2D Cs<sub>3</sub>Bi<sub>2</sub>Br<sub>3</sub>I<sub>5.2</sub> micro crystals, calculated from UPS spectra

| Work Function ( $E_F$ ) | $E_F - E_{VBM}$ | $E_{VBM}$ | Bandgap ( $E_g$ ) | $E_{CBM}$ | Semiconducting type |
|-------------------------|-----------------|-----------|-------------------|-----------|---------------------|
| 5.38                    | 1.68            | 7.06      | 2.03              | 5.03      | n-type              |

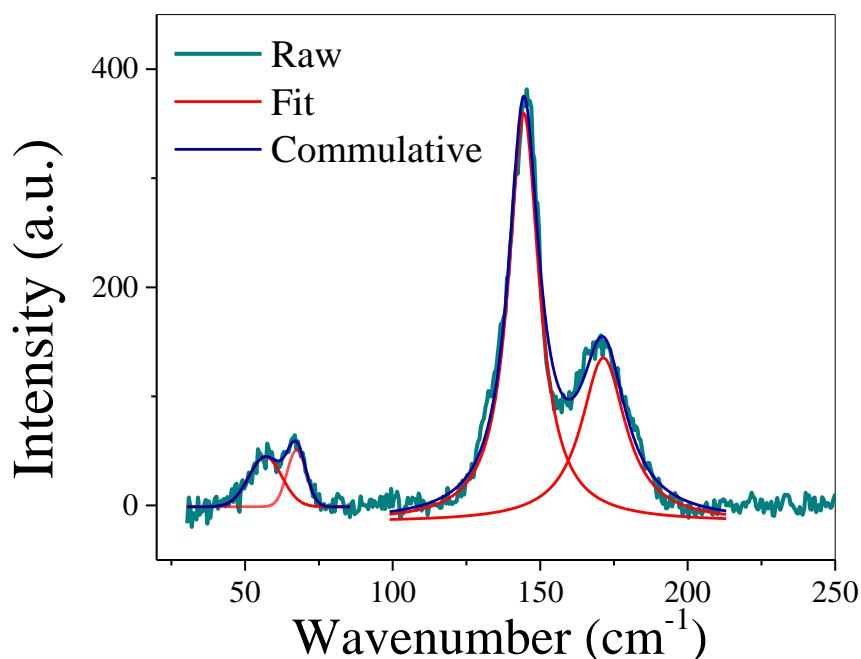

**Figure S18.** Raman spectra of 2D-Cs<sub>3</sub>Bi<sub>2</sub>Br<sub>3</sub>I<sub>5.2</sub> MC recorded with a 530 nm excitation wavelength.

**Table S10:** Details of Raman spectra of Cs<sub>3</sub>Bi<sub>2</sub>Br<sub>3</sub>I<sub>5.2</sub>

| Symmetry        | Description                     | Wavenumber (cm <sup>-1</sup> ) | Energy (meV) | Ref. |
|-----------------|---------------------------------|--------------------------------|--------------|------|
| E <sub>2g</sub> | Bridge Bi–Br symmetric stretch  | 169.06                         | 21.11        | 12   |
| A <sub>1g</sub> | terminal Bi–I symmetric stretch | 145.46                         | 18.16        | 13   |
| E <sub>g</sub>  | Bi–Br bending mode              | 66.83                          | 8.34         | 12   |
| A <sub>1g</sub> | Bi–I bending mode               | 57.47                          | 7.17         | 13   |

### Section 3: Details of the calculation of trap density ( $\eta_{\text{trap}}$ ) and mobility ( $\mu$ ).

$$n_{trap} = \frac{2\varepsilon_0 \varepsilon V_{TFL}}{ql^2} \text{---} \text{---} \text{---} \text{---} \text{---} (S2)^{14}$$

$$J_d = \frac{9}{8} \epsilon_0 \epsilon \mu \frac{v^2}{l^3} \text{-----} (S3)^{15}$$

where,  $\eta_{\text{trap}}$  = trap density ( $\text{cm}^{-3}$ )

 $\epsilon_0$  = free space permittivity $\epsilon$  = relative dielectric constant of perovskite (12.47 for  $\text{Cs}_3\text{Bi}_2\text{Br}_3\text{I}_6$ )

$q$  = elementary charge

$l$  = Gap between two electrodes, 55  $\mu\text{m}$ .

$J_d$  = current density

$\mu$  = carrier mobility

$V$  = applied voltage

**Section 4:** Details of photoconductivity and diffusion length ( $L_D$ ) calculation.

$$I = \frac{I_0 \mu \tau V}{l^2} \frac{1 - \exp\left(-\frac{l^2}{\mu \tau V}\right)}{1 + \frac{lS}{\mu V}} \text{--- (S4)}^{16}$$

$$L_D = \sqrt{\frac{k_B T \mu \tau}{e}} \text{--- (S5)}^{17}$$

Where,  $I$  = photocurrent

$I_0$  = saturated photocurrent

$\mu \tau$  = mobility-lifetime product

$l$  = Gap between two electrodes, 55  $\mu\text{m}$

$V$  = applied voltage

$S$  = surface recombination velocity

$k_B$  = Boltzmann constant

$T$  = sample temperature

$e$  = elementary charge

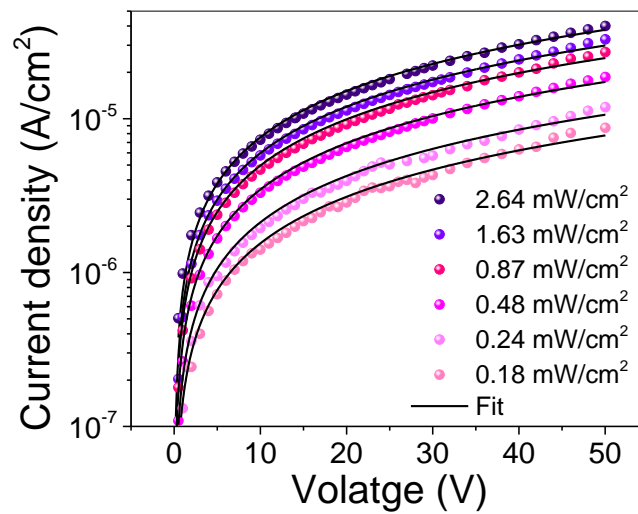

**Figure S19.** Fitting of photocurrent as a function of voltage using the modified Hecht equation under various light intensities (0.18 to 2.64  $\text{mW}/\text{cm}^2$ ).

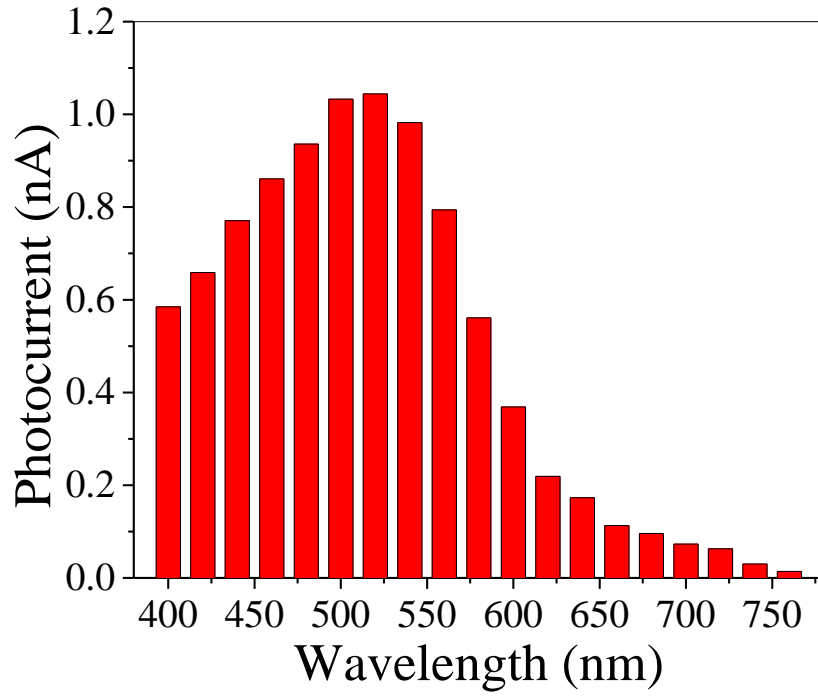

**Figure S20:** Photocurrent of 2D-Cs<sub>3</sub>Bi<sub>2</sub>Br<sub>3</sub>I<sub>5.2</sub> MC-based photodetector across the wavelength range from 400 nm to 800nm.

#### Section 5: Photodetector figure of merit (FOM) estimation

##### Responsivity ( $R_\lambda$ )<sup>18</sup>

$$R_\lambda = \frac{J_{ph}}{P_{Light}} \text{ --- (S6)}$$

$$J_{ph} = \frac{I_{ph}}{A} \text{ --- (S7)}$$

Where,  $R_\lambda$ = responsivity

$J_{ph}$ = photocurrent density

$I_{ph} = I_l - I_d$  = photocurrent

$I_l$ = light current

$I_d$ = dark current

$P_{Light}$ = light intensity

A = active area of the device

##### Detectivity ( $D$ )<sup>18</sup>

$$D = \frac{R_\lambda}{\sqrt{2qJ_d}} \text{ --- (S8)}$$

Where,  $D$ = Detectivity

$R_\lambda$ = responsivity

$q$  = charge of the electron

#### Details of Noise Equivalent Power (NEP).<sup>18</sup>

$$NEP = \frac{S_I}{R_\lambda} \text{---(S9)}$$

$$S_I = \sqrt{\frac{\langle I_{noise}^2 \rangle}{1 \text{ Hz}}} \text{---(S10)}$$

Where,  $NEP$  = Noise equivalent power

$S_I$  = RMS value of dark current density at 1 Hz bandwidth

$I_{noise}$  = dark current

$R_\lambda$  = wavelength-dependent responsivity

**Rise and fall time calculation.**<sup>18</sup>

$$I = I_0 - I_0 \times e^{\left(\frac{-x}{t_r}\right)} \text{---(S11)}$$

$$I = I_0 + A_1 \times e^{(-x/t_f)} \text{---(S12)}$$

$I$  = current

$I_0$  = initial value of current

$A_1$  = independent variables

$t_r$  = rise time,  $t_f$  = fall time,  $x$  = time

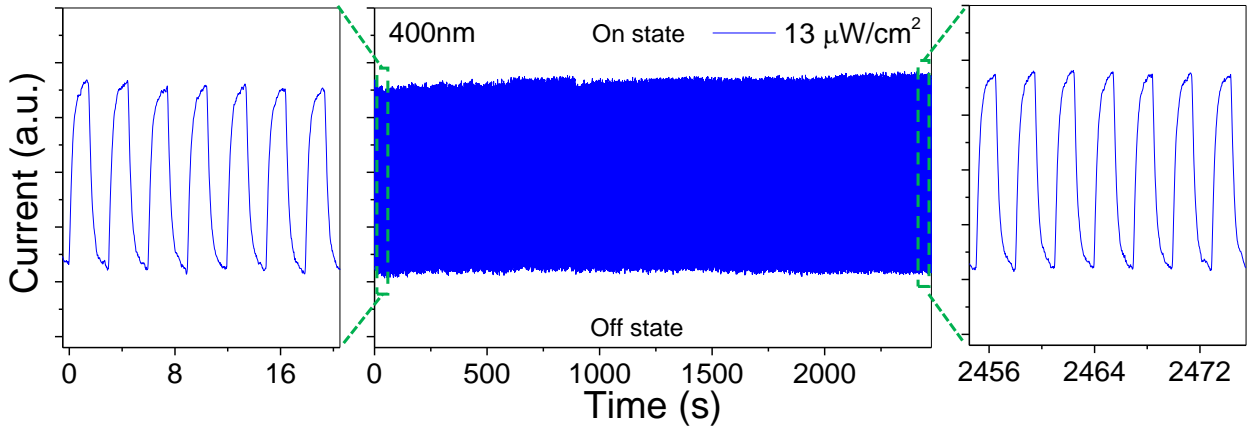

**Figure S21.** Transient photocurrent stability of  $\text{Cs}_3\text{Bi}_2\text{Br}_3\text{I}_{5.2}$  based photodetector with 828 on-off cycles under 0.3 Hz 450nm light illumination.

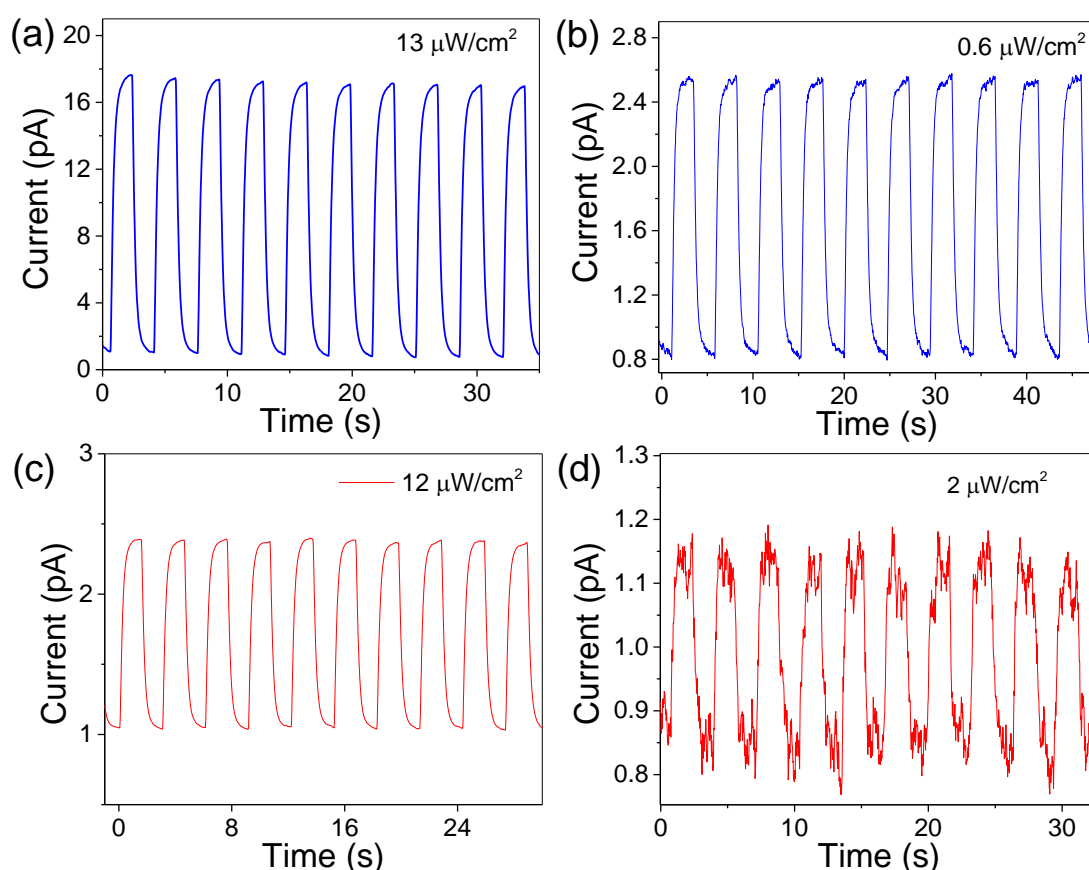

**Figure S22.** Real-time photocurrent response of the photodetector under 450 nm light at intensities of (a)  $13 \mu\text{W}/\text{cm}^2$  and (b)  $0.6 \mu\text{W}/\text{cm}^2$ , and under 650 nm light at intensities of (c)  $12 \mu\text{W}/\text{cm}^2$  and (d)  $0.7 \mu\text{W}/\text{cm}^2$ .

**Table S11:** Comparison of Bi-based halide perovskite self-powered photodetector performance in the literature

| Sl. No. | Material (structure)                                   | Morphology | Device structure                                                                                                     | R (A/W)               | D (Jones)                     | Range of detection | Reference     |
|---------|--------------------------------------------------------|------------|----------------------------------------------------------------------------------------------------------------------|-----------------------|-------------------------------|--------------------|---------------|
| 1.      | $\text{Cs}_3\text{Bi}_2\text{Br}_3\text{I}_{5.2}$ (2D) | MC         | $\text{Au}/\text{Cs}_3\text{Bi}_2\text{Br}_3\text{I}_{5.2}/\text{ITO}$                                               | 0.9                   | $1.6 \times 10^{12}$ @ 540 nm | Visible and NIR    | Our work      |
| 2.      | $\text{Cs}_3\text{Bi}_2\text{I}_9$ (0D)                | TF         | $\text{FTO}/\text{Cs}_3\text{Bi}_2\text{I}_9/\text{Ag}$                                                              | $7.29 \times 10^{-8}$ | $2.17 \times 10^3$            | Visible            | <sup>19</sup> |
| 3.      | $\text{Cs}_3\text{Bi}_2\text{I}_9$ (0D)                | MC         | $\text{ITO}/\text{SnO}_2/\text{Cs}_3\text{Bi}_2\text{I}_9/\text{PTAA}/\text{Au}/\text{ITO}$                          | 0.052                 | $2.9 \times 10^{11}$ @ 405 nm | Visible            | <sup>20</sup> |
| 4.      | $\text{Cs}_3\text{Bi}_2\text{I}_6\text{Br}_3$ (2D)     | TF         | $\text{ITO}/\text{PEDOT:PSS}/\text{Cs}_3\text{Bi}_2\text{I}_6\text{Br}_3/\text{C}_{60}/\text{B}/\text{CP}/\text{Ag}$ | 0.015                 | $4.6 \times 10^{11}$ @ 400 nm | Visible            | <sup>21</sup> |
| 5.      | $\text{Cs}_3\text{Sb}_2\text{I}_9$ (2D)                | TF         | $\text{Au}/\text{PolyTPD}/\text{Cs}_3\text{Sb}_2\text{I}_{9-x}\text{Cl}_x/\text{TiO}_2/\text{FTO}$                   | 0.062                 | $3.5 \times 10^{12}$ @ 505 nm | Visible            | <sup>22</sup> |

|     |                                                                          |    |                                                                                                        |        |                                    |         |               |
|-----|--------------------------------------------------------------------------|----|--------------------------------------------------------------------------------------------------------|--------|------------------------------------|---------|---------------|
| 6.  | Cs <sub>3</sub> Sb <sub>2</sub> I <sub>9-x</sub> Cl <sub>x</sub><br>(2D) | TF | Au/PolyTPD/<br>Cs <sub>3</sub> Sb <sub>2</sub> I <sub>9-x</sub> Cl <sub>x</sub> /TiO <sub>2</sub> /FTO | 0.205  | 6.1 × 10 <sup>12</sup><br>@ 505 nm | Visible | <sup>22</sup> |
| 7.  | Rb <sub>3</sub> Sb <sub>2</sub> I <sub>9</sub><br>(0D)                   | TF | Au/PolyTPD/<br>Rb <sub>3</sub> Sb <sub>2</sub> I <sub>9</sub> /TiO <sub>2</sub> /FTO                   | 0.174  | 4.3 × 10 <sup>12</sup><br>@ 505 nm | Visible | <sup>22</sup> |
| 8.  | Cs <sub>2</sub> AgBiBr <sub>6</sub><br>(3D)                              | TF | Au/Cs <sub>2</sub> AgBiBr <sub>6</sub><br>/SnO <sub>2</sub> /ITO                                       | 0.0001 | 2.1 × 10 <sup>10</sup><br>@ 350 nm | Visible | <sup>23</sup> |
| 9.  | Cs <sub>3</sub> Bi <sub>2</sub> Br <sub>9</sub><br>(2D)                  | TF | ITO/NiO <sub>x</sub> /<br>Cs <sub>3</sub> Bi <sub>2</sub> Br <sub>9</sub> /Au                          | 0.0043 | 1.3 × 10 <sup>11</sup><br>@ 420 nm | Visible | <sup>24</sup> |
| 10. | Ns-MA <sub>3</sub> Bi <sub>2</sub> I <sub>9</sub><br>(0D)                | TF | FTO/c-TiO <sub>2</sub> / Ns-<br>MA <sub>3</sub> Bi <sub>2</sub> I <sub>9</sub> /graphite               | 0.0001 | 0.61 × 10 <sup>7</sup><br>@ 480 nm | Visible | <sup>25</sup> |

**Table S12.** Rise and Decay Times for Cs<sub>3</sub>Bi<sub>2</sub>Br<sub>9</sub>I<sub>5.2</sub>-Based Photodetector Under Band-to-Band and Mid-Gap Light Illumination

| S. No. | Absorption Region | Wavelength (nm) | Rise time (T <sub>r</sub> , ms) | Decay time (T <sub>d</sub> , ms) |
|--------|-------------------|-----------------|---------------------------------|----------------------------------|
| 1      | Band to band      | 450             | 238                             | 248                              |
| 2      | Mid-gap           | 650             | 144                             | 163                              |

## Note and references

- 1 P. R. Jubu, F. K. Yam, V. M. Igba and K. P. Beh, *J. Solid State Chem.*, 2020, **290**, 121576.
- 2 G. Kresse and J. Hafner, *Phys. Rev. B*, 1994, **49**, 14251–14269.
- 3 G. Kresse and J. Hafner, *Phys. Rev. B*, 1993, **47**, 558–561.
- 4 D. Joubert, *Phys. Rev. B - Condens. Matter Mater. Phys.*, 1999, **59**, 1758–1775.
- 5 G. Kresse and J. Furthmüller, *Phys. Rev. B*, 1996, **54**, 11169–11186.
- 6 J. P. Perdew, K. Burke and M. Ernzerhof, *Phys. Rev. Lett.*, 1996, **77**, 3865–3868.
- 7 J. D. Pack and H. J. Monkhorst, *Phys. Rev. B*, 1977, **16**, 1748–1749.
- 8 K. Momma and F. Izumi, *J. Appl. Crystallogr.*, 2011, **44**, 1272–1276.
- 9 A. M Ganose, A. J Jackson and D. O Scanlon, *J. Open Source Softw.*, 2018, **3**, 717.
- 10 M. Leng, Y. Yang, K. Zeng, Z. Chen, Z. Tan, S. Li, J. Li, B. Xu, D. Li, M. P. Hautzinger, Y. Fu, T. Zhai, L. Xu, G. Niu, S. Jin and J. Tang, *Adv. Funct. Mater.*, 2018, **28**, 1704446 (1–11).
- 11 J. Gu, G. Yan, Y. Lian, Q. Mu, H. Jin, Z. Zhang, Z. Deng and Y. Peng, *RSC Adv.*, 2018,



- 8, 25802–25807.
- 12 M. Y. Valakh, M. P. Lisitsa, E. Y. Peresh, O. V. Trylis and A. M. Yaremko, *J. Mol. Struct.*, 1997, **436–437**, 309–313.
  - 13 P. Acharyya, K. Pal, A. Ahad, D. Sarkar, K. S. Rana, M. Dutta, A. Soni, U. V. Waghmare and K. Biswas, *Adv. Funct. Mater.*, 2023, **33**, 1–10.
  - 14 M. Bouzidi, M. Ben Bechir, D. R. Almalawi, I. H. Smaili, F. Aljuaid and N. I. Aljuraide, *Opt. Mater. (Amst.)*, 2024, **154**, 115640.
  - 15 V. M. Le Corre, E. A. Duijnste, O. El Tambouli, J. M. Ball, H. J. Snaith, J. Lim and L. J. A. Koster, *ACS Energy Lett.*, 2021, **6**, 1087–1094.
  - 16 Y. Liu, Z. Xu, Z. Yang, Y. Zhang, J. Cui, Y. He, H. Ye, K. Zhao, H. Sun, R. Lu, M. Liu, M. G. Kanatzidis and S. (Frank) Liu, *Matter*, 2020, **3**, 180–196.
  - 17 D. Shi, V. Adinolfi, R. Comin, M. Yuan, E. Alarousu, A. Buin, Y. Chen, S. Hoogland, A. Rothenberger, K. Katsiev, Y. Losovyj, X. Zhang, P. A. Dowben, O. F. Mohammed, E. H. Sargent and O. M. Bakr, *Science (80-. )*, 2015, **347**, 519–522.
  - 18 K. D. M. Rao, M. Hossain, Umesh, A. Roy, A. Ghosh, G. S. Kumar, P. Moitra, T. Kamilya, S. Acharya and S. Bhattacharya, *Nanoscale*, 2020, **12**, 11986–11996.
  - 19 S. Devasia, S. Shaji, D. A. Avellaneda, J. A. A. Martinez and B. Krishnan, *J. Alloys Compd.*, 2022, **893**, 162294.
  - 20 K. Dong, H. Zhou, M. Xiao, P. Gui, Z. Gao, F. Yao, W. Shao, C. Liu, C. Tao, W. Ke and G. Fang, *Appl. Phys. Lett.*, 2022, **120**, 1312–1317.
  - 21 D. Liu, B.-B. Yu, M. Liao, Z. Jin, L. Zhou, X. Zhang, F. Wang, H. He, T. Gatti and Z. He, *ACS Appl. Mater. Interfaces*, 2020, **12**, 30530–30537.
  - 22 J. Mei, M. Liu, P. Vivo and V. Pecunia, *Adv. Funct. Mater.*, 2021, **31**, 2106295.
  - 23 L. Z. Lei, Z. F. Shi, Y. Li, Z. Z. Ma, F. Zhang, T. T. Xu, Y. T. Tian, D. Wu, X. J. Li and G. T. Du, *J. Mater. Chem. C*, 2018, **6**, 7982–7988.
  - 24 Y. Liu, Y. Gao, J. Zhi, R. Huang, W. Li, X. Huang, G. Yan, Z. Ji and W. Mai, *Nano Res.*, 2022, **15**, 1094–1101.
  - 25 A. Bhorde, S. Nair, H. Borate, S. Pandharkar, R. Aher, A. Punde, A. Waghmare, P. Shinde, P. Vairale, R. Waykar, V. Doiphode, V. Jadkar, Y. Hase, S. Rondiya, N. Patil, M. Prasad and S. Jadkar, *New J. Chem.*, 2020, **44**, 11282–11290.
